# Supplementary material for: When yeast cells change their mind: cell cycle “Start” is reversible under starvation
Source: PubMed Central journal article supplement — EMBO J. 2022 Nov 23;42(2):e110321. doi: 10.15252/embj.2021110321 (PMC9841329; doi:10.15252/embj.2021110321), 2022-11-23
Supplement: EMBJ-42-e110321-s005.pdf [file EMBJ-42-e110321-s005.pdf]

**Appendix**  
**Supplementary Material for:**

**When Yeast Cells Change their Mind: Cell Cycle “Start” is Reversible under Starvation**

Deniz Irali, Fabian P. Schlottmann, Prathibha Muralidhara, Iliya Nadelson, Katja Kleemann, N. Ezgi Wood, Andreas Doncic, and Jennifer C. Ewald

| <b>Table of content</b>                                                                | <b>page</b> |
|----------------------------------------------------------------------------------------|-------------|
| <b>Supplementary Tables:</b>                                                           |             |
| Appendix Table S1. Yeast strains used in this study                                    | <b>2</b>    |
| Appendix Table S2. Optical filters for microscopy                                      | <b>5</b>    |
| Appendix Table S3. Exposure times and intensities                                      | <b>5</b>    |
| <b>Supplementary Figures:</b>                                                          |             |
| Appendix Figure S1 Main Figure 1C, re-colored to indicate Whi5 re-entries              | <b>6</b>    |
| Appendix Figure S2 Cln2 promoter reporters used in this study                          | <b>7</b>    |
| Appendix Figure S3 Whi5 nuclear intensity increase is driven mainly by import-part1    | <b>8</b>    |
| Appendix Figure S4 Whi5 nuclear intensity increase is driven mainly by import-part2    | <b>9</b>    |
| Appendix Figure S5 Htb2 fluorescence under starvation                                  | <b>10</b>   |
| Appendix Figure S6. Budding and Histones                                               | <b>11</b>   |
| Appendix Figure S7 Cln2 Promoter activity in cells with different Whi5 re-entry slopes | <b>12</b>   |
| Appendix Figure S8 Clb2 levels in starved cells                                        | <b>13</b>   |
| Appendix Figure S9 Msn2 localization upon starvation                                   | <b>14</b>   |
| Appendix Figure S10 The estradiol inducible promoter remains active under starvation   | <b>15</b>   |
| Appendix Figure S11 Sic1 concentrations in Whi5 re-entry cells                         | <b>16</b>   |
| Appendix Figure S12 Phenotype of Cdc55 deletions                                       | <b>17</b>   |
| <b>Appendix References</b>                                                             | <b>19</b>   |

**Appendix Table S1:** Yeast strains used in this study. All strains are W303 derivatives. All strains can be obtained from the corresponding author upon request.

| <b>Name</b> | <b>Figures</b>                                                                                                                                                         | <b>Genotype</b>                                                                                                                        | <b>Source</b>                                   |
|-------------|------------------------------------------------------------------------------------------------------------------------------------------------------------------------|----------------------------------------------------------------------------------------------------------------------------------------|-------------------------------------------------|
| FS042       | Non-fluorescent control                                                                                                                                                | MAT $\alpha$ , ADE2, TRP1, LEU2, URA3, HIS3                                                                                            | This study                                      |
| DI002       | Figure 1B,C<br>Figure 2E,F<br>Figure 3<br>Figure 4D-F<br>Figure 5 A<br>Figure EV1<br>Movie EV2<br>App. Figure S3<br>App. Figure S4<br>App. Figure S5<br>App. Figure S6 | MAT $\alpha$ , Htb2-mTFP-Nat, Whi5-mCherry-KanMX, Sic1-mNeogreen-hph, ADE2, LEU2, HIS3, TRP1, URA3                                     | This Study                                      |
| DI028       | Figure 1C<br>Figure 2E<br>Figure 3A,B,C<br>Figure 4A-C<br>App. Figure S2<br>App. Figure S7                                                                             | MAT $\alpha$ , Whi5-mCherry-KanMX, ura3::Cln2-promoter-mNeogreen-URA3, ADE2, TRP1, LEU2,                                               | This Study                                      |
| FS034       | Figure 2<br>Movie EV1<br>App. Figure S2                                                                                                                                | MAT $\alpha$ , Whi5-mCherry-KanMX, leu2::cln2-promoter-dPSTR-mCitrine-LEU2, ADE2, TRP1, URA3                                           | Ewald Lab [1]                                   |
| FS002       | Figure 1C<br>Figure 2E<br>Figure 3C-D<br>Figure 5 A-B<br>App. Figure S11                                                                                               | MAT $\alpha$ , Whi5-mCherry-KanMX, Sic1-mNeogreen-hph<br>ADE2, TRP1, LEU2, URA3, HIS3                                                  | This study                                      |
| KCY003      |                                                                                                                                                                        | mat $\alpha$ , whi5 $\Delta$ ::CglaTRP11, ADE2                                                                                         | Kind gift of Kora-Lee Claude and Kurt Schmoller |
| DI011       | Figure EV2                                                                                                                                                             | MAT $\alpha$ , whi5::CglaTRP11, ura3::Whi5-wildtype-mNeogreen-URA3, ADE2 LEU2                                                          | This Study (from KCY003)                        |
| DI041       | Figure EV2                                                                                                                                                             | MAT $\alpha$ , whi5::CglaTRP11, ura3::Whi5-7A*-mNeogreen-URA3, ADE2 LEU2<br>*S78, S113, S114, S149, S76, T281, S288 mutated to alanine | This Study (from KCY003)                        |
| DI031       | Figure 5A                                                                                                                                                              | MAT $\alpha$ , Whi5-mCherry-KanMX, Cip1::HphMX<br>ADE2, TRP1, LEU2, URA3                                                               | This Study                                      |
| DI045       | Figure 5A                                                                                                                                                              | MAT $\alpha$ , Whi5-mCherry-KanMX, Msn2::HphMX<br>Msn4::HisMX, ADE2, TRP1, URA3                                                        | This Study                                      |
| BY6883      |                                                                                                                                                                        | MAT $\alpha$ , Msa1::HIS3, Msa2::KanMX<br>ADE2, TRP1, LEU2, URA3                                                                       | Breeden Lab [2]                                 |

|        |                                     |                                                                                                                                                            |                             |
|--------|-------------------------------------|------------------------------------------------------------------------------------------------------------------------------------------------------------|-----------------------------|
| DI047  | Figure 5A                           | MAT a, Msa1::HIS3, Msa2::KanMX<br>Whi5-mNeongreen-Hph, ADE2, TRP1,<br>LEU2, URA3                                                                           | This Study<br>(from BY6883) |
| BY6602 |                                     | MAT a, Xbp1::KanMX, ADE2, TRP1,<br>LEU2, URA3, HIS3                                                                                                        | Breeden Lab [2]             |
| DI043  | Figure 5A                           | MAT a, Whi5-mNeongreen-HphMX,<br>Xbp1::NatMX, ADE2, TRP1, LEU2,<br>URA3, HIS3                                                                              | This Study<br>(from BY6602) |
| BY6828 |                                     | MAT a, Sic1::KanMX, ADE2, LEU2,<br>TRP1, HIS3, URA3                                                                                                        | Breeden Lab [2]             |
| DI038  | Figure 5A                           | MAT a, Whi5-mNeongreen-HphMX,<br>Sic1::KanMX<br>ADE2, LEU2, TRP1, HIS3, URA3                                                                               | This Study<br>(from BY6828) |
| DI040  | Figure 5A                           | mat a, Whi5-mCherry-KanMX, htb2-<br>TFP-NAT, Rim15:: HphMX, ADE2,<br>TRP1, LEU2, URA3                                                                      | This Study                  |
| JE616  | Figure 5A<br>Figure 6<br>Figure EV3 | MAT $\alpha$ , cln1 $\Delta$ , cln2 $\Delta$ , cln3::LEU2,<br>lexOPr-Cln1-Leu2, ADE2, his3::cyc1-Pr-<br>lexO TF-HIS3, TRP1, URA3,<br>Whi5-GFP-NatMX        | Ewald Lab [3]               |
| KK079  | Figure 6                            | mat $\alpha$ , cln1 $\Delta$ , cln2 $\Delta$ , cln3::LEU2,<br>lexOPr-Cln1-Leu2, ADE2, his3::cyc1-Pr-<br>lexO TF-HIS3, TRP1, URA, Whi5::Whi5-<br>V5-KanMX   | This Study                  |
| KK083  | Figure 6                            | mat $\alpha$ , cln1 $\Delta$ , cln2 $\Delta$ , cln3::LEU2,<br>lexOPr-Cln1-Leu2, ADE2, his3::cyc1-Pr-<br>lexO TF-HIS3, TRP1, URA, Whi5::Whi5-<br>Flag-HphMX | This Study                  |
| KK087  | App. Figure S10                     | mat $\alpha$ , ADE2, TRP1, LEU2, his3::LexO<br>transcription factor- HIS3, ura3:: LexA<br>promoter-mKO-URA3(estradiol inducible<br>mKO)                    | This Study                  |
| DI036  |                                     | mat a, Whi5-mCherry-KanMX, Htb2-<br>mTFP-NatMX, Cdc55::hphMX, ADE2,<br>TRP1, LEU2, URA3                                                                    | This Study                  |
| TS010  | Figure EV3                          | mat a, Whi5-mCherry-KanMX,<br>swe1::KanMX, ADE2, LEU2, HIS3,<br>TRP1                                                                                       | This Study                  |
| KK097  | App. Figure S12                     | mat a, Whi5-mCherry-KanMX,<br>Swe1::KanMX, ADE2, LEU2, HIS3,<br>TRP1, Cdc55::NatMX                                                                         | This Study                  |
| TS007  | App. Figure S8                      | mat a, Whi5-mCherry-KanMX, ADE2,<br>TRP1, URA3, HIS3, LEU2, Clb2-<br>Neongreen-NAT                                                                         | This Study                  |

|       |                |                                                                                                                                                |            |
|-------|----------------|------------------------------------------------------------------------------------------------------------------------------------------------|------------|
| KK069 | Figure EV3     | mat $\alpha$ , cln1 $\Delta$ , cln2 $\Delta$ , cln3::leu2, lexOPr-Cln1-Leu2, ADE2, his3::cyc1-Pr-lexO TF-his3, TRP, URA, Cdk1::Cdk1-FLAG-HphMX | This Study |
| TS019 | App. Figure S8 | mat $\alpha$ , Clb2-Neongreen-NAT, Whi5-mCherry-KanMX, ADE, TRP, LEU, URA, HIS                                                                 | This Study |

**Appendix Table S2: Optical filters for microscopy**

Filters used for imaging on a Nikon Ti2-E epifluorescence microscope.

All described filters are manufactured by Chroma and purchased from AHF.

| Fluorophore | LED Wave-length | Filter Set                      | Excitation Filter                                   | Dichroic                        | Emission Filter                                        |
|-------------|-----------------|---------------------------------|-----------------------------------------------------|---------------------------------|--------------------------------------------------------|
| mTFP        | 475 nm          | TFP ET Filter Set               | ET445/30x                                           | T470lpxr, Di 25 mm x 36 mm      | ZET488/10x                                             |
| Neongreen   | 513 nm          | YFP ET Filter Set               | ET500/20x                                           | T515lp, Di 25 mm x 36 mm        | ET535/30m                                              |
| mCitrine    | 513 nm          | YFP ET Filter Set               | ET500/20x                                           | T515lp, Di 25 mm x 36 mm        | ET535/30m                                              |
| mCherry     | 575 nm          | CFP/YFP/mCherry/Cy7 QUAD LED ET | Quadband Exciter ET/422-449/496-517/566-588/709-752 | Quadband Beamsplitter (89402bs) | Quadband Emitter ET/463-484/ 529-550/ 605-678/ 773-845 |

**Appendix Table S3: Exposure times and intensities.**

| Fluorophore | Imaged Protein                        | Intensity   | Exposure Time   |
|-------------|---------------------------------------|-------------|-----------------|
| mTFP        | Htb2                                  | 10 %        | 100 ms          |
| mNeongreen  | Whi5, Sic1, Cln2-Promoter, Msn2, Clb2 | 15 % - 30 % | 200 ms - 300 ms |
| mCitrine    | Cln2-promoter-dPSTR                   | 30 %        | 300 ms          |
| mCherry     | Whi5                                  | 40 % - 60 % | 300 ms - 600 ms |

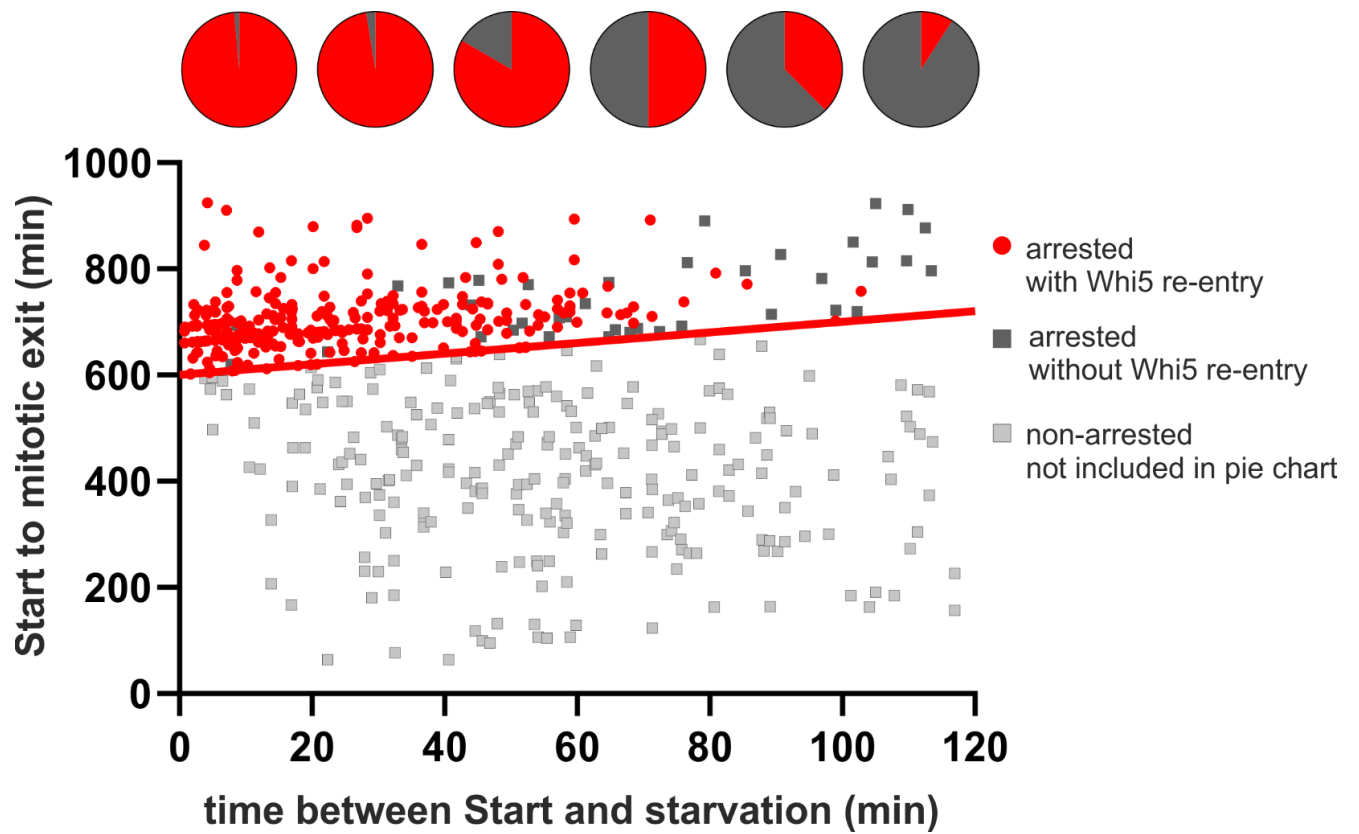

**Appendix Figure S1. Whi5 re-entries.** Same data as in main Figure 1C, but color-coded to show Whi5 re-entries upon starvation. Pie charts show fractions of the arrested cells that re-import Whi5. Pie charts do not include the light-grey non-arrested cells.

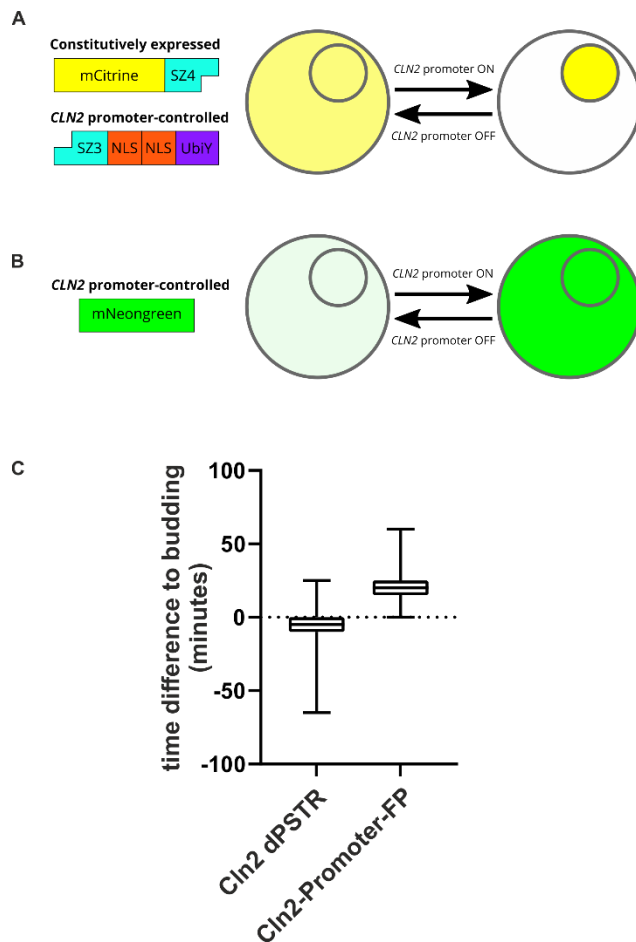

**Appendix Figure S2: Cln2 promoter reporters used in this study.** The dynamic protein synthesis translocation reporters (dPSTR) developed by the Pelet lab [4] circumvent the time delay in expression analysis caused by fluorescent protein maturation. A fluorescent protein is constitutively expressed, while a small protein containing an interaction domain and a nuclear localization sequence is under control of the promoter of interest. We used this in Figure 2 to monitor the precise timing of Cln2 promoter activation in cells that passed Start before encountering starvation. Since we observed a decrease in total fluorescence during starvation from this construct, we used another construct to monitor Cln2 promoter activity after glucose re-addition. **B.** To monitor Cln2-promoter activity after starvation in Figure 4, we constructed a plasmid containing a Cln2-promoter driving Neongreen expression and integrated it at the URA3 locus. **C.** We analyzed the timing of the peak of the two reporter constructs relative to budding in unperturbed cells. n=231 cells for the dPSTR and n=199 cells for the Cln2-Pr-NG; The box plots indicate the time difference between budding and the peak in the fluorescent signal. Boxes indicate the median and the 25<sup>th</sup> and 75<sup>th</sup> percentile, bars indicate 5<sup>th</sup> and 95<sup>th</sup> percentile.

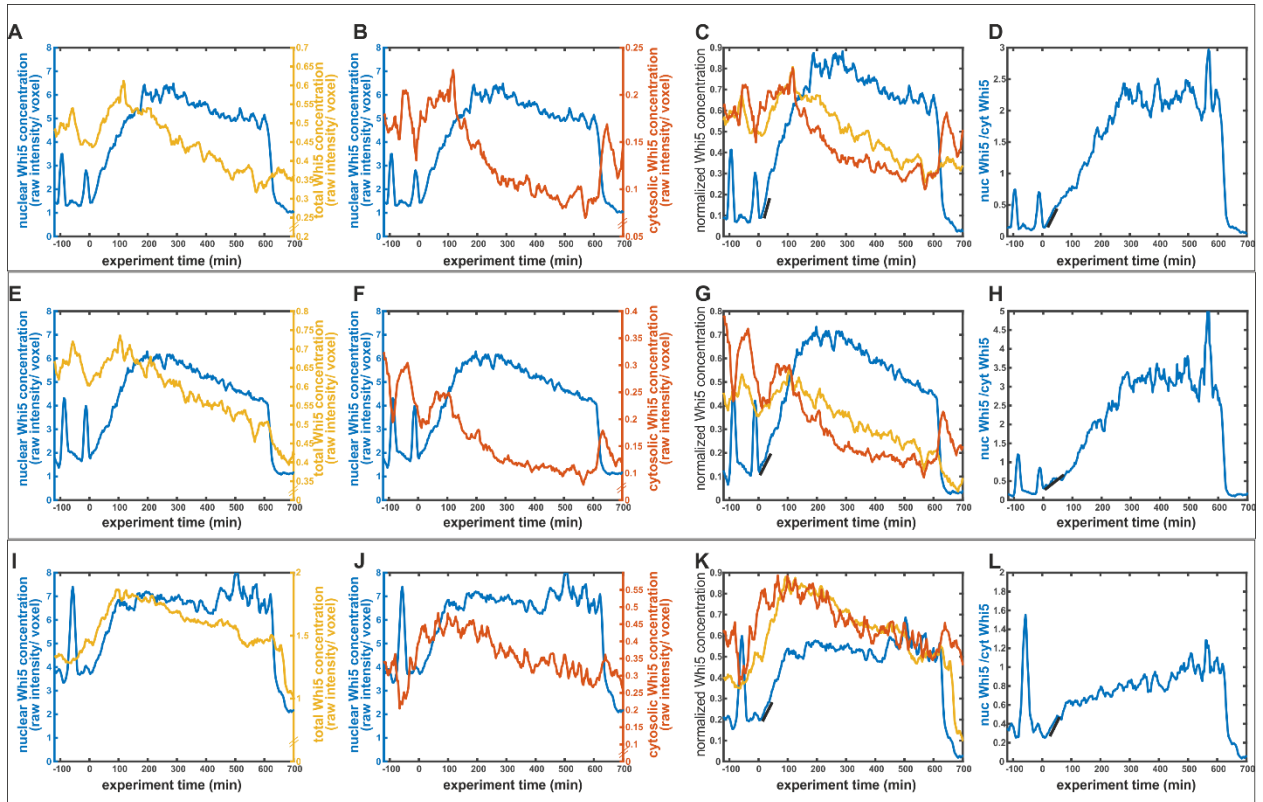

**Appendix Figure S3: Whi5 nuclear intensity increase is driven mainly by import-part1. A.-L.** Here we show three example cells with different Whi5 re-entry slopes, each row represents one cell. Cells were starved between time  $t=0$  minutes and  $t=600$  minutes. We report the raw intensities per voxel (area in  $\text{pixels}^{3/2}$ ) for total, nuclear and cytoplasmic Whi5 concentrations (A-B,E-F,I-J). Please note the very different scales in left and right axis. The third plot in each row shows an overlay of the scaled and normalized concentrations (C,G,K). The fourth plot shows the ratio between nuclear and cytoplasmic Whi5 (D,H,L). The black lines in C-D,G-H, K-L indicate schematically the slopes that are plotted in Figure S4. **A.-D.** An example cell that was 6 min post Start at starvation onset, was unbudded and had a Whi5-re-entry slope of  $>200$ . **E.-H.** An example cell that was 12 min post Start at starvation onset, was still unbudded but had a Whi5- re-entry slope of  $<200$ . **I.-L.** An example cell that was 48 min post Start at starvation onset, was budded and had a Whi5- re-entry slope of  $<200$ .



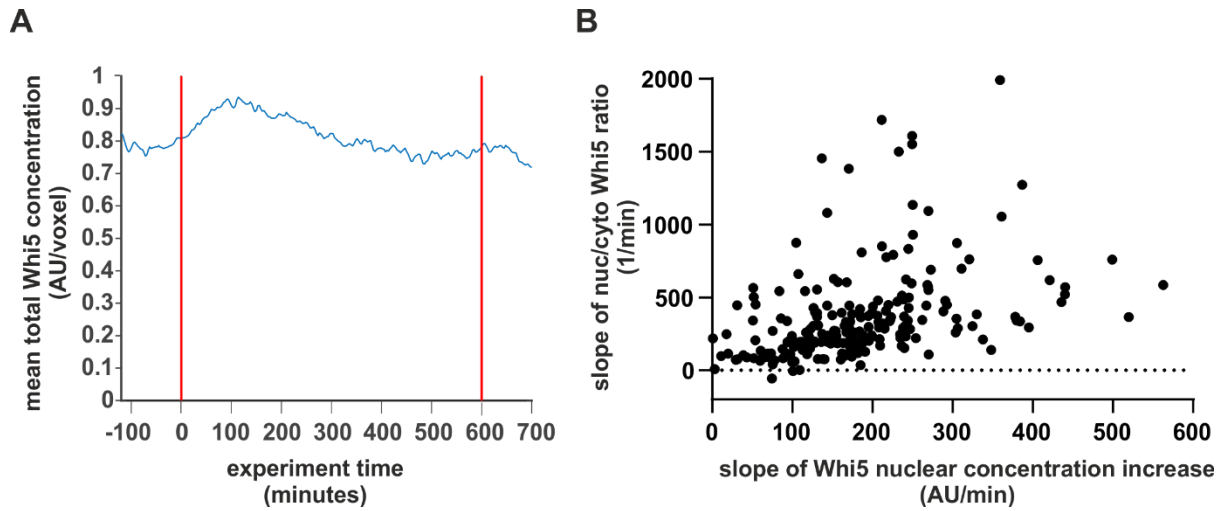

**Appendix Figure S4: Whi5 nuclear intensity increase is driven mainly by import-part2** **A.** Average total Whi5 concentration from 81 asynchronous cells. We cannot disentangle whether the increase is mainly caused by fluorescent artefacts at the onset of starvation or an actual increase in Whi5 transcription. **B.** The slope of nuclear Whi5 concentration (as used in all the main figures) versus the slope of the ratio of nuclear to cytoplasmic Whi5 concentrations (Figure S3 D,H,L) is plotted. (N= 214 cells, data from one replicate each from main Figures 1 and 3.) Since the slopes of the ratios are positive, and the two slopes are correlated, we conclude that the increase in nuclear fluorescence is mainly due to active import, with likely some contribution by an overall increase in Whi5.

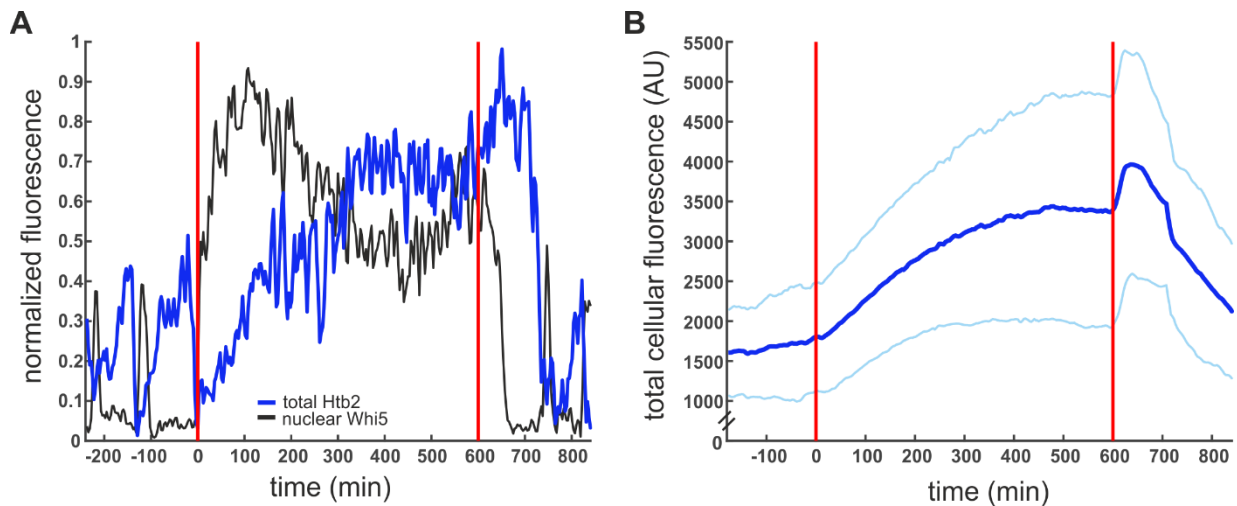

**Appendix Figure S5: Starvation induces an increase of Htb2-mTFP fluorescence. A.** This is an example cell which goes through cytokinesis and enters G1 just before the starvation begins. The black line indicates normalized nuclear Whi5 concentration, the blue line indicates the normalized total cellular Htb2 fluorescence intensity, the red lines indicate beginning and end of the starvation period. Even though the cell is clearly in a normal G1, the Htb2-TFP fluorescence increases more than in a typical pre-starvation S-phase. **B.** Average total Htb2 intensity of 240 asynchronous cells. The light blue lines depict the standard deviation. During starvation, the average fluorescence increases more than twofold, even though only a small fraction of the cells is expected to be in S-phase. Here we plot the total cellular fluorescence; however, the shape of the curve is similar when plotting nuclear total fluorescence or concentration (fluorescence intensity/voxel). A similar effect was observed for Htb2-mCherry.

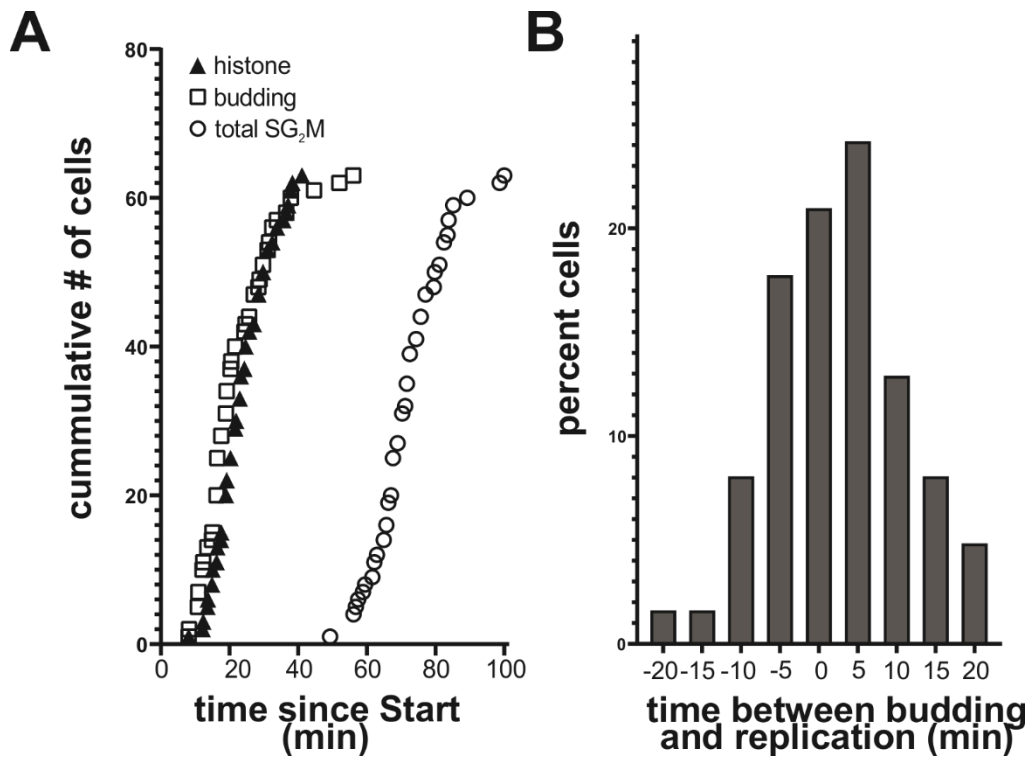

**Appendix Figure S6: Budding and replication coincide but are not directly coupled** **A.** Timing of budding and replication in relation to Start of cells growing on glucose minimal medium. Htb2-TFP fluorescence increase was used as a proxy for replication onset. 65 single cells growing on glucose minimal medium were observed and the time between Start, budding, and onset of histone production were recorded. S/G<sub>2</sub>/M corresponds to the time between Whi5 exit, and Whi5 entry in mother and bud at the end of mitosis. **B.** Histogram of the time difference between budding and increase of Htb2 fluorescence in the 65 cells described in A.

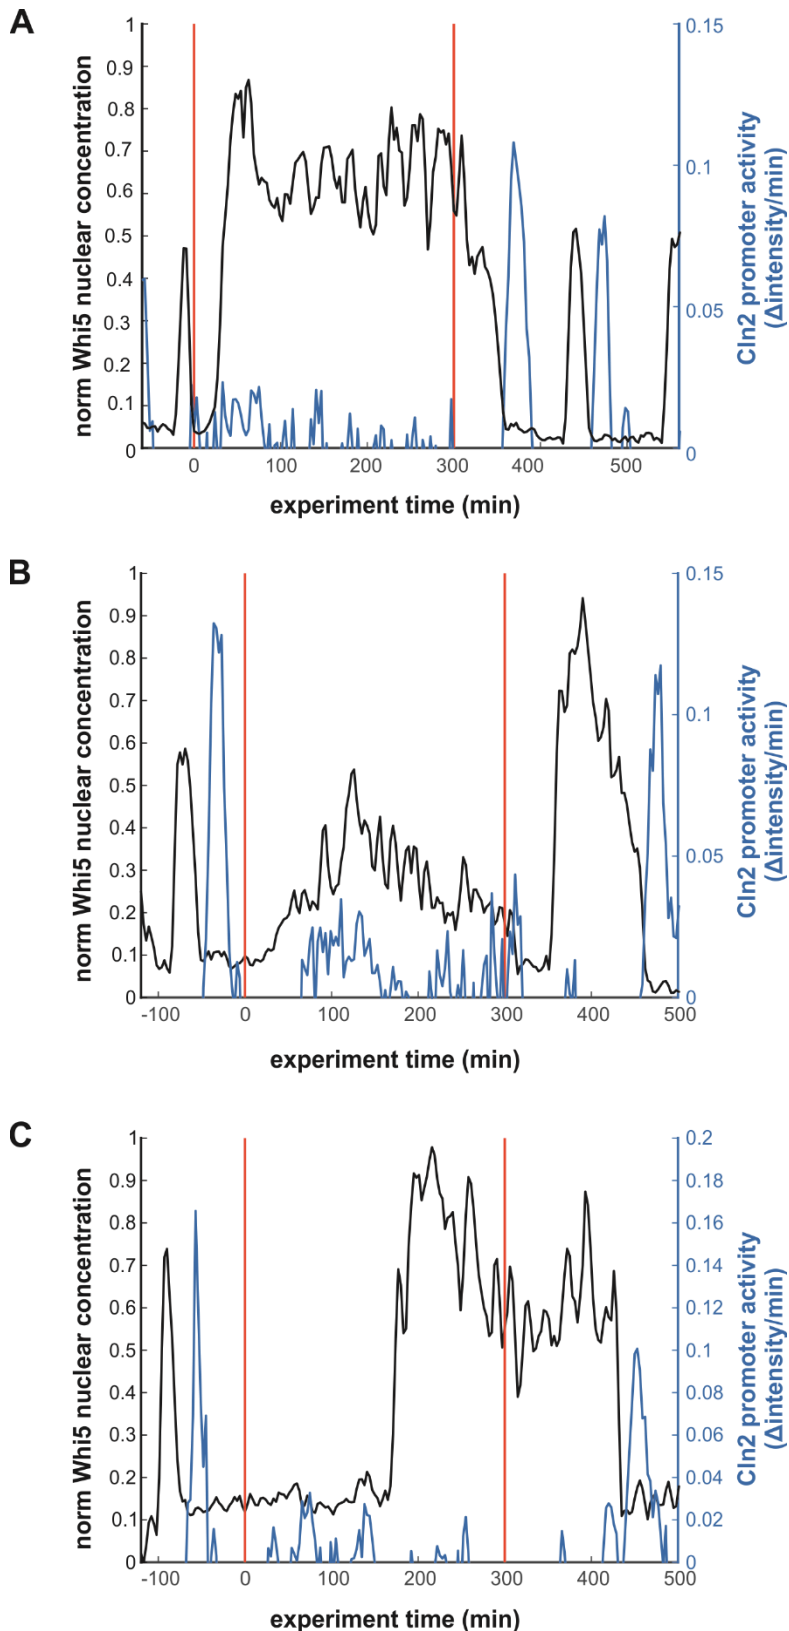

**Appendix Figure S7: Examples for Cln2 promoter activity under starvation.** Cells were grown on glucose medium, then starved for 5 hours, after which the glucose was replenished. Vertical solid red lines indicate onset and end of starvation phase. **A.** Example of a cell with steep Whi5-re-entry (like Figure 4A). Likely because the time between Start and starvation is too short for the fluorophore to mature, we do not detect the firing of the Cln2 promoter the first time the cell passes Start. However, using the dPSTR construct in Figure 2 we could show that Whi5 exits always lead to Cln2 promoter activity. When glucose is replenished, the Cln2 promoter becomes active again. **B.** Example of a cell with slow Whi5 re-entry. Typically, in cells with slow Whi5 re-entries the initial Cln2 promoter activity can be clearly detected and cells have already passed this peak when Whi5 returns to the nucleus. When glucose is replenished, cells complete their cell cycle without showing a second Cln2 peak. **C.** Example of a cell without Whi5 re-entry (“delayed” category in Figure 1). Cln2 promoter activity can be detected after Start and the cell is already 80 minutes post-Start when faced with starvation. The cell completes the cell cycle and arrests in G1. After glucose replenishment, the cell passes the next Start including Cln2 promoter activity.

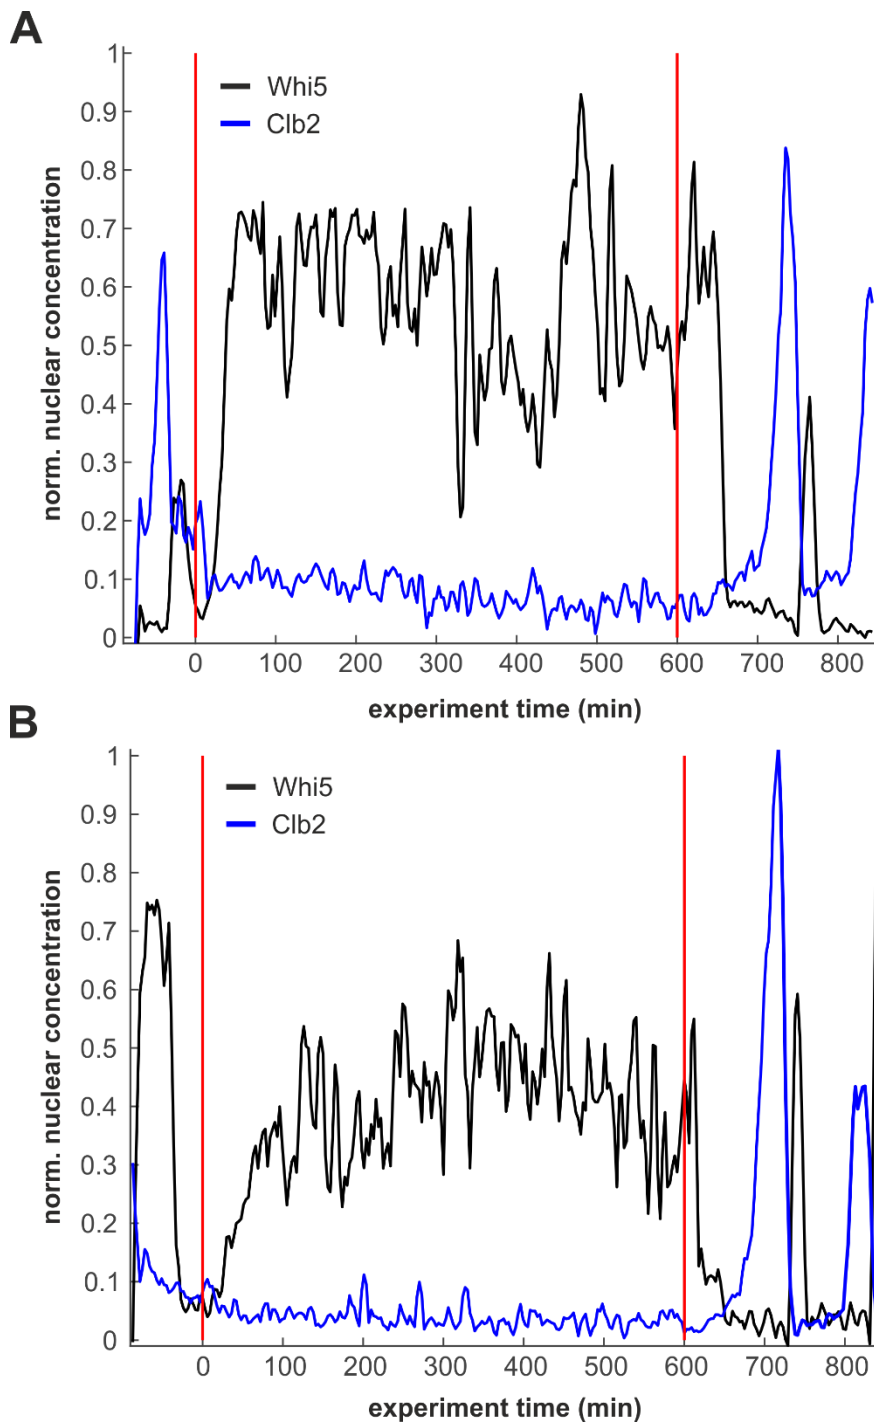

**Appendix Figure S8: Expression of Clb2 in Whi5 re-entry cells.** Cells expressing Whi5-mCherry and Clb2-Neogreen were grown for six hours on glucose minimal medium and then switched to sorbitol minimal medium at  $t=0$  minutes. All cells in which we could detect Whi5 re-import ( $n=81$ , from two biological replicates) displayed a clear peak in Clb2 protein levels ( $>50\%$  of the last pre-starvation peak) after glucose replenishment and before the next mitosis. This indicates that all cells showing Whi5 re-entry arrest before the G2/M transition. Red lines indicate beginning and end of 10 hour starvation period. **A.** Example cell with a fast Whi5 re-entry (slope  $>200$ ). **B.** Example cell with a slow Whi5 re-entry (slope  $<200$ ).

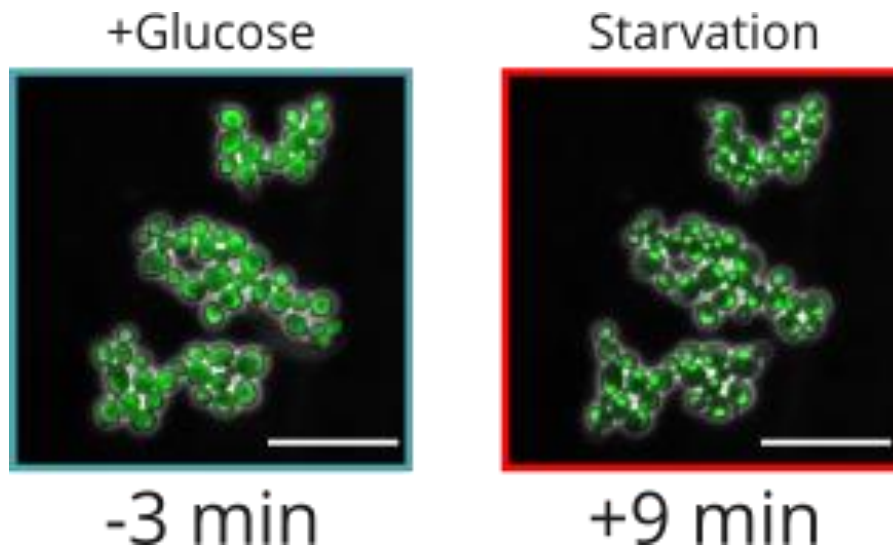

**Appendix Figure S9: The response of Msn2 to starvation medium.** Cells expressing Msn2-Neongreen were grown for six hours on glucose minimal medium and then switched to sorbitol minimal medium at t=0 minutes. All observed cells imported Msn2 to the nucleus within 10 minutes. The Neongreen signal in both composite pictures was enhanced using ImageJ plug in “Non-Local Means Denoising” [5]. Scale bar represents 20  $\mu\text{m}$ .

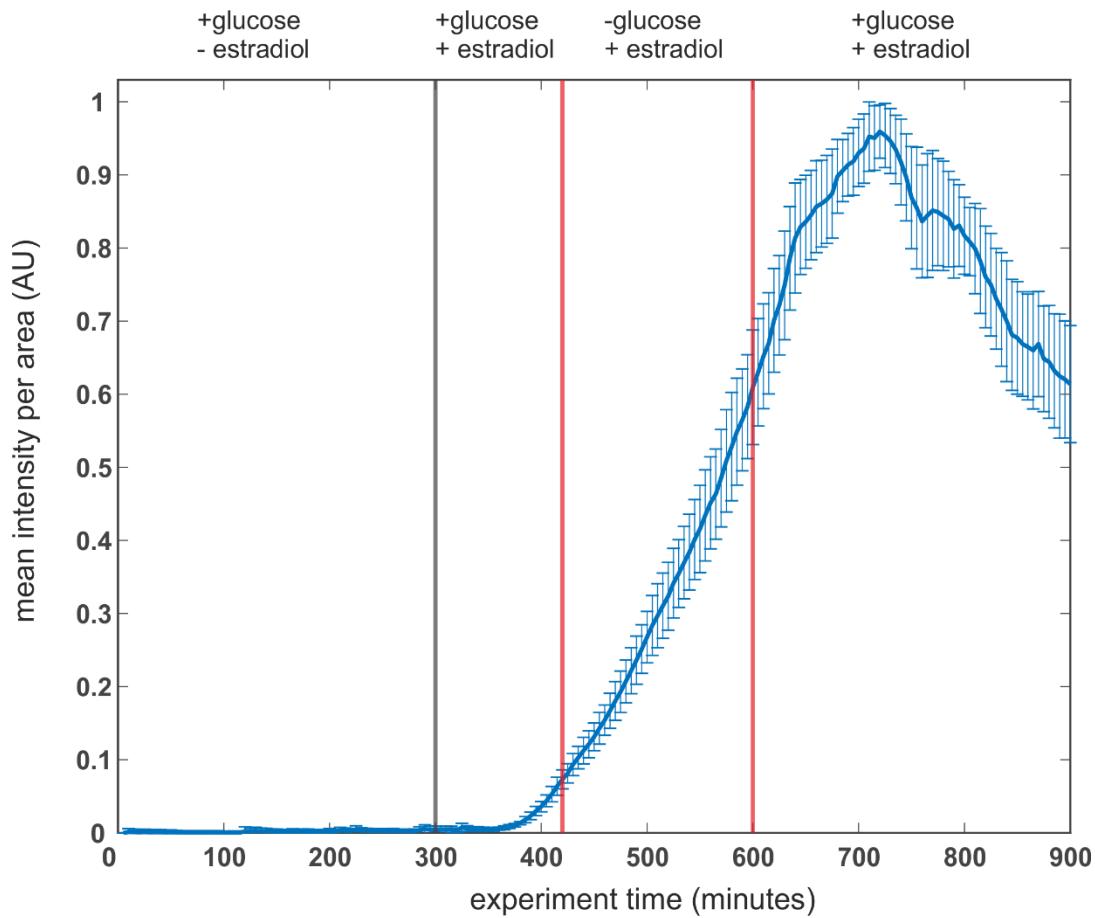

**Appendix Figure S10: The estradiol promoter is active under starvation.** To test if the estradiol promoter [6] retains activity under starvation, we constructed a plasmid where the estradiol promoter drives expression of the fluorophore mKo. This plasmid was integrated into the *ura3* locus. Cells were grown on glucose minimal medium for six hours, when mKo expression was induced by adding 1 $\mu$ M estradiol (the same amount as used for the *Cln1* promoter). Two hours later we switched to starvation medium, but maintained the estradiol concentration. Because cells stop growing, but the estradiol promoter is active, cells continuously accumulate fluorescence signal. Shown is the mean and standard deviation of 16 cells.

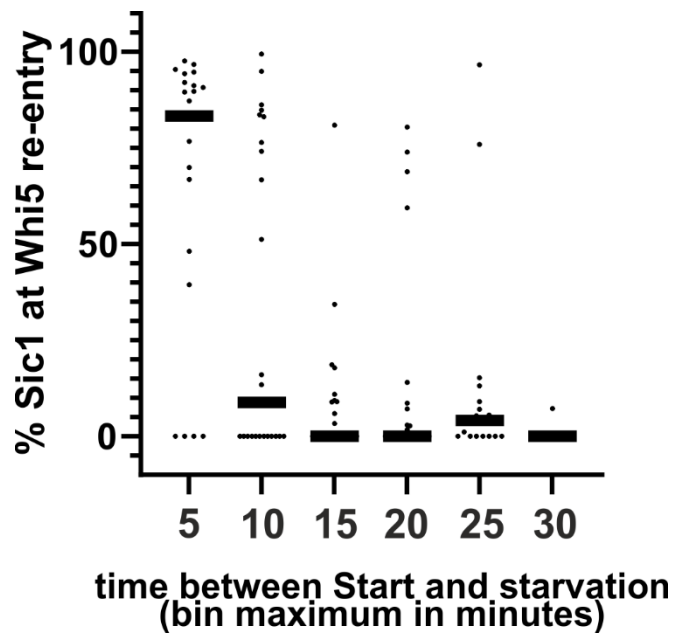

**Appendix Figure S11: Whi5 re-entry is independent of Sic1 concentrations.** For all cells that showed fast re-entries of Whi5 (i.e. reverse Start), we determined the concentration of Sic1 (total fluorescence per area) at the beginning of Whi5 re-entry. Each dot represents an individual cell (n=149, from two biological replicates), bars represent the bin median.



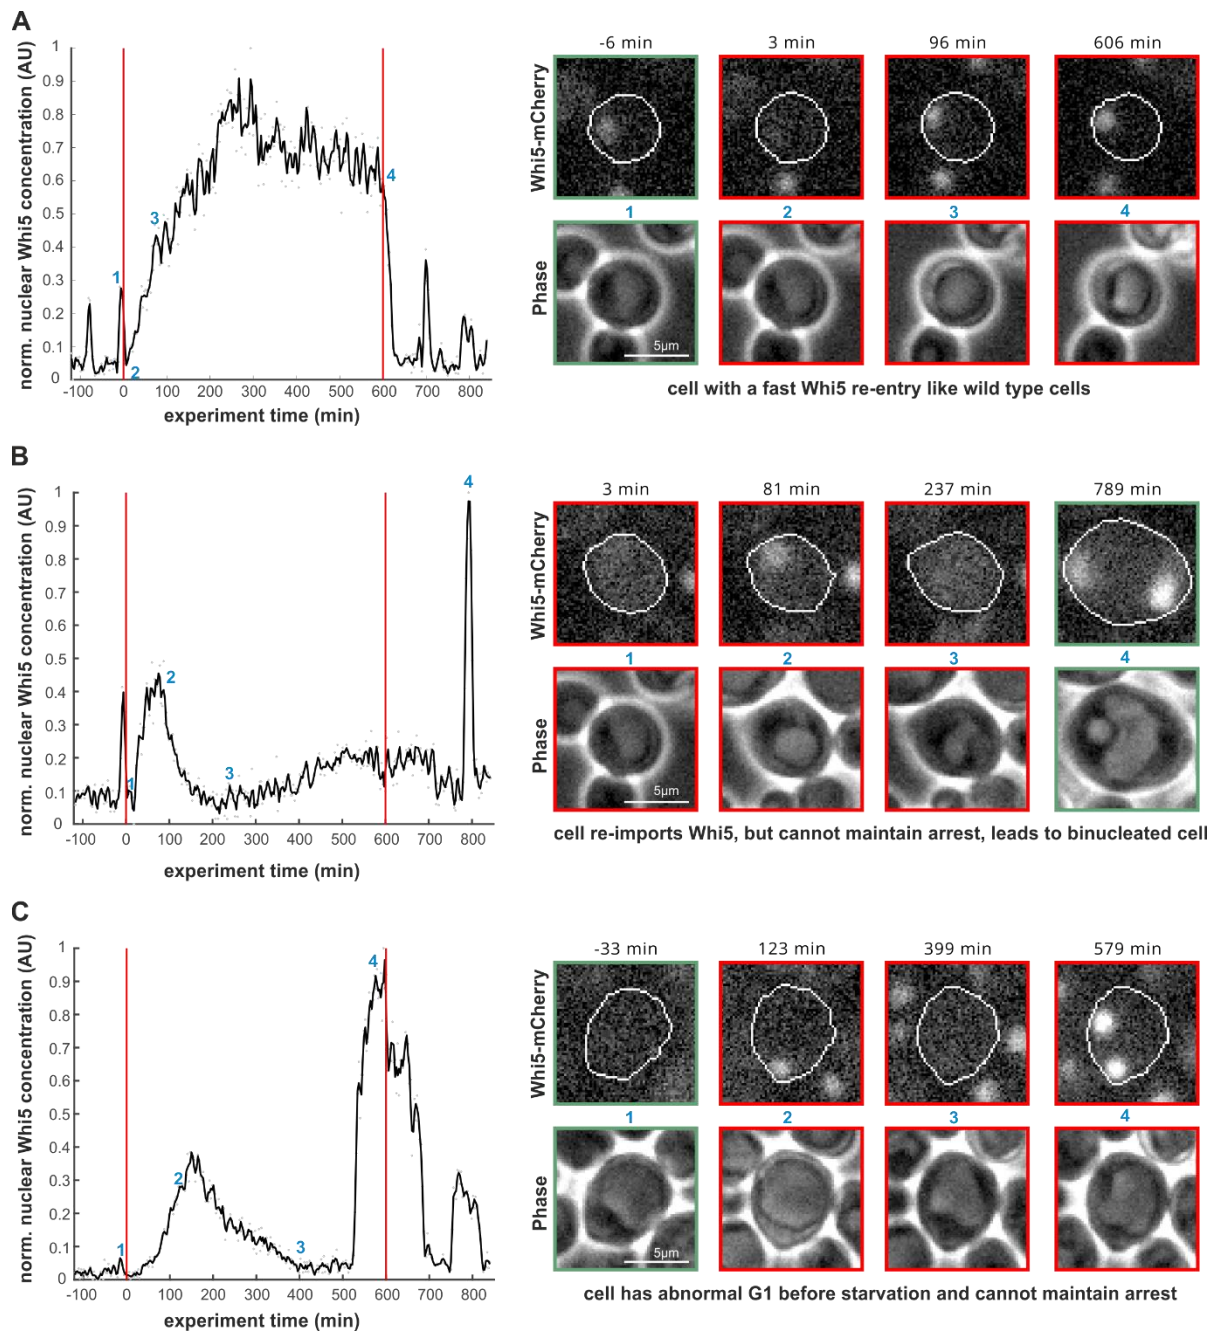

**Appendix Figure S12: The phenotype of a *cdc55 swe1* deletion strain.** The *cdc55* deletion leads to pleiotropic phenotypes that could not be properly analyzed. The *cdc55 swe1* double deletion ameliorates some of the mitotic defects leading to more normal-looking cells. Nonetheless, this double mutant has an irregular G1/S transition and also has difficulties in handling starvation. Three example cells are shown; on the left the quantification of nuclear Whi5, on the right the corresponding images. Blue numbers indicate the time points in the data for which we show the images. Red lines indicate beginning and end of the starvation period. **A.** An example cell that behaves like wild type cells: This cell passes Start approximately 3 minutes before the switch to starvation. It re-imports Whi5 and goes into a stable G1 arrest until glucose is replenished. **B.** An example cell that re-imports Whi5, similar to wild type cells. However, after two hours, the cell cannot maintain this arrest and Whi5 leaves the nucleus. After glucose replenishment, the cell reimports Whi5 into two nuclei, indicating

that there was mitosis without budding, leading to a binucleated cell. A similar phenotype was occasionally also seen in *swe1* single deletion mutants. **C.** This cell, like many *cdc55* mutant cells that we observed, does not show any nuclear Whi5 peak during the very short G1 phases during growth on glucose. Around 35 minutes before starvation the last cytokinesis could be observed, so this cell has likely entered the next round of S-phase when faced with starvation. During starvation, this cell also goes through mitosis without division, leading to a binucleated cell. In summary, our observations suggest that Cdc55 is an important cell cycle regulator during growth and during starvation, but it is not essential for re-importing Whi5 immediately after Start.

## Appendix References

1. Nadelson, I., *Sensors for monitoring cell cycle regulation during nutrient perturbations*. 2020, Eberhard Karls University of Tuebingen.
2. Miles, S., et al., *Msa1 and Msa2 Modulate G1-Specific Transcription to Promote G1 Arrest and the Transition to Quiescence in Budding Yeast*. PLoS Genet, 2016. **12**(6): p. e1006088.
3. Ewald, J.C., et al., *The yeast cyclin-dependent kinase routes carbon fluxes to fuel cell cycle progression*. Molecular Cell, 2016.
4. Aymoz, D., et al., *Real-time quantification of protein expression at the single-cell level via dynamic protein synthesis translocation reporters*. Nat Commun, 2016. **7**: p. 11304.
5. Buades, A., Coll, B., Morel, J.-M. , *Non-Local Means Denoising*. Image Processing On Line, 2011. **1**: p. 208–212.
6. Ottoz, D.S., Rudolf, F., and Stelling, J., *Inducible, tightly regulated and growth condition-independent transcription factor in Saccharomyces cerevisiae*. Nucleic Acids Res, 2014.
